# Supplementary material
Source: MDPI journal article supplement (https://www.mdpi.com/2075-5309/12/6/827)
Supplement: s1 [file s1]

The sources of the identifiable images in Figure 3, 4, 5, and 7 are shown below:

Figure 3.

A:<http://5b0988e595225.cdn.sohucs.com/images/20180925/bb7283dc63864b95b2400c65fd1bb8f2.jpeg>

Figure 4.

A:<http://5b0988e595225.cdn.sohucs.com/images/20190517/a88dd22cefa8458fb839c81e2137215e.jpeg>

B:<http://mms1.baidu.com/it/u=2670696221,379263844&fm=253&app=120&f=JPEG&fmt=auto&q=75?w=500&h=360>

C:<http://5b0988e595225.cdn.sohucs.com/images/20180925/bb7283dc63864b95b2400c65fd1bb8f2.jpeg>

D:<http://mms1.baidu.com/it/u=3883254610,1319947768&fm=253&app=138&f=JPEG&fmt=auto&q=75?w=500&h=667>

E:<http://mms0.baidu.com/it/u=4287159511,3680610206&fm=253&app=120&f=JPEG&fmt=auto&q=75?w=663&h=500>

Figure 5.

A:<http://5b0988e595225.cdn.sohucs.com/images/20190517/a88dd22cefa8458fb839c81e2137215e.jpeg>

B:<http://mms1.baidu.com/it/u=2670696221,379263844&fm=253&app=120&f=JPEG&fmt=auto&q=75?w=500&h=360>

C:<http://5b0988e595225.cdn.sohucs.com/images/20180925/bb7283dc63864b95b2400c65fd1bb8f2.jpeg>

D:<http://mms1.baidu.com/it/u=3883254610,1319947768&fm=253&app=138&f=JPEG&fmt=auto&q=75?w=500&h=667>

E:<http://mms0.baidu.com/it/u=4287159511,3680610206&fm=253&app=120&f=JPEG&fmt=auto&q=75?w=663&h=500>

Figure 7.

A:<http://mms2.baidu.com/it/u=4259526967,1288433537&fm=253&app=120&f=JPEG&fmt=auto&q=75?w=472&h=300>

F:<http://mms0.baidu.com/it/u=4287159511,3680610206&fm=253&app=120&f=JPEG&fmt=auto&q=75?w=663&h=500>
